# Supplementary material
Source: PubMed Central journal article supplement (PMC5088767)

# 3'UTR of TGF- $\beta$ R1

Relative gene expression

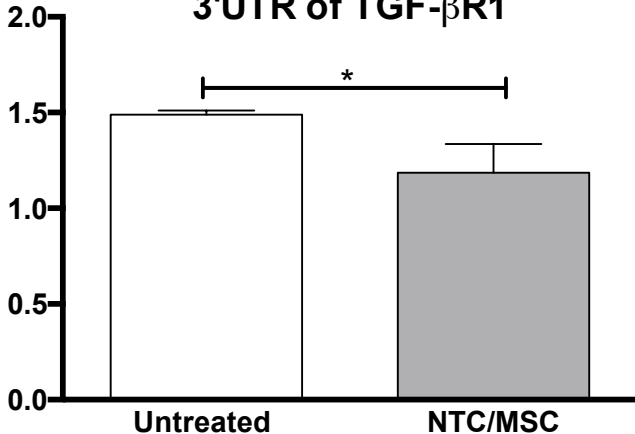

Supplement: mt201690x1.pdf [file mt201690x1.pdf]
